# Supplementary material for: EBV encoded miRNA BART8-3p promotes radioresistance in nasopharyngeal carcinoma by regulating ATM/ATR signaling pathway
Source: PubMed Central journal article supplement (PMC6744588; doi:10.1042/bsr20190415), 2019-09-13

Supplementary Fig. 1

A

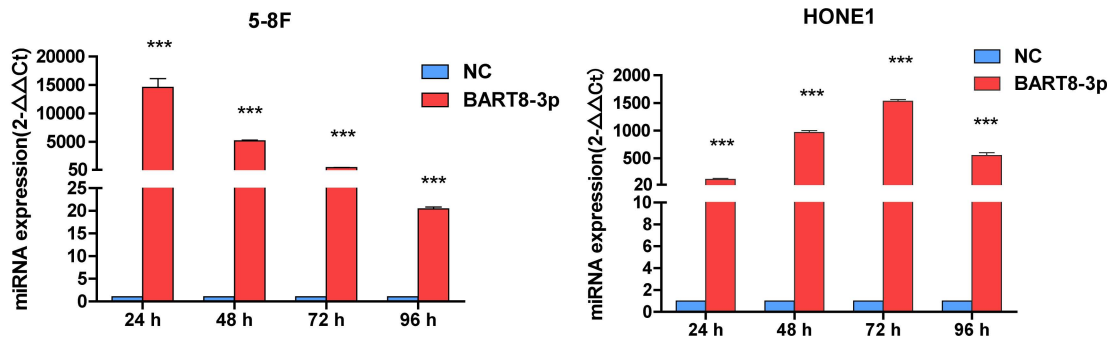

B

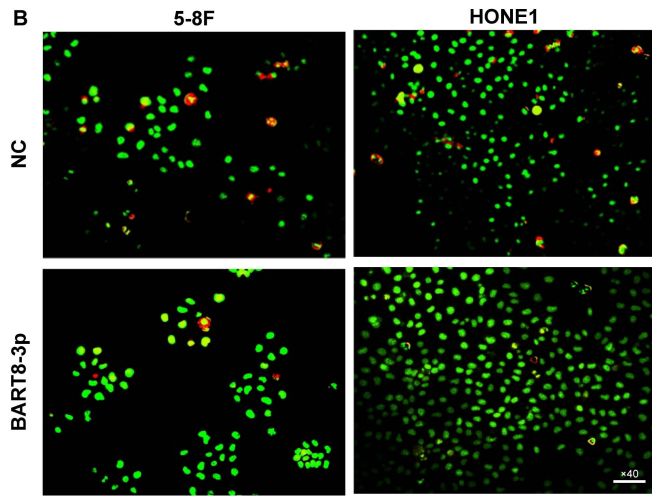

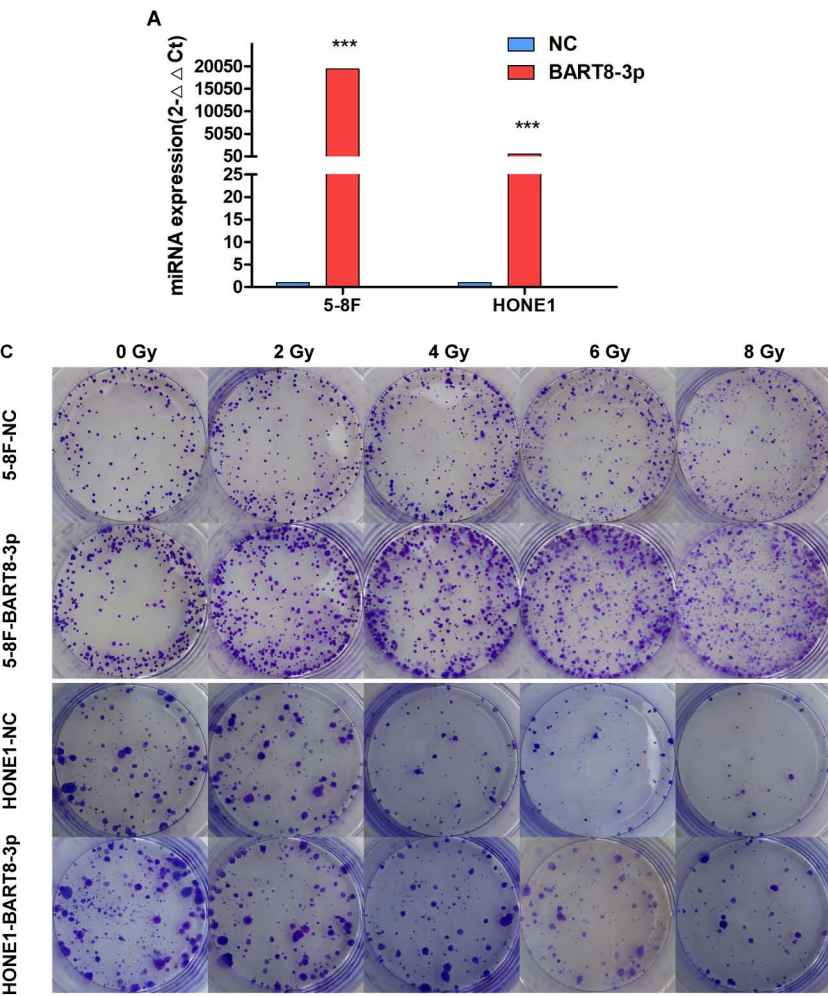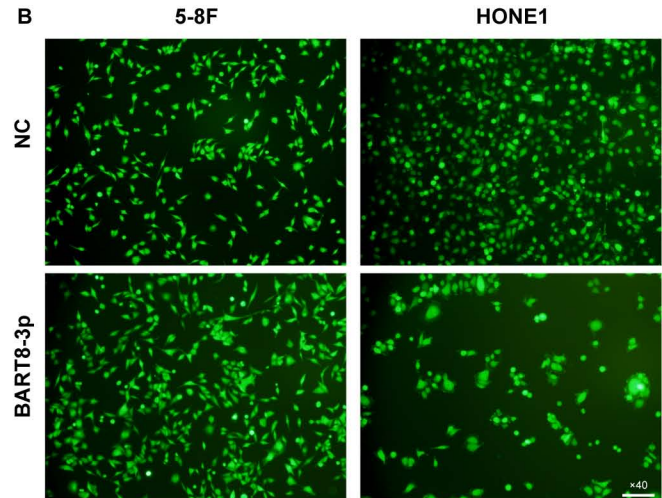

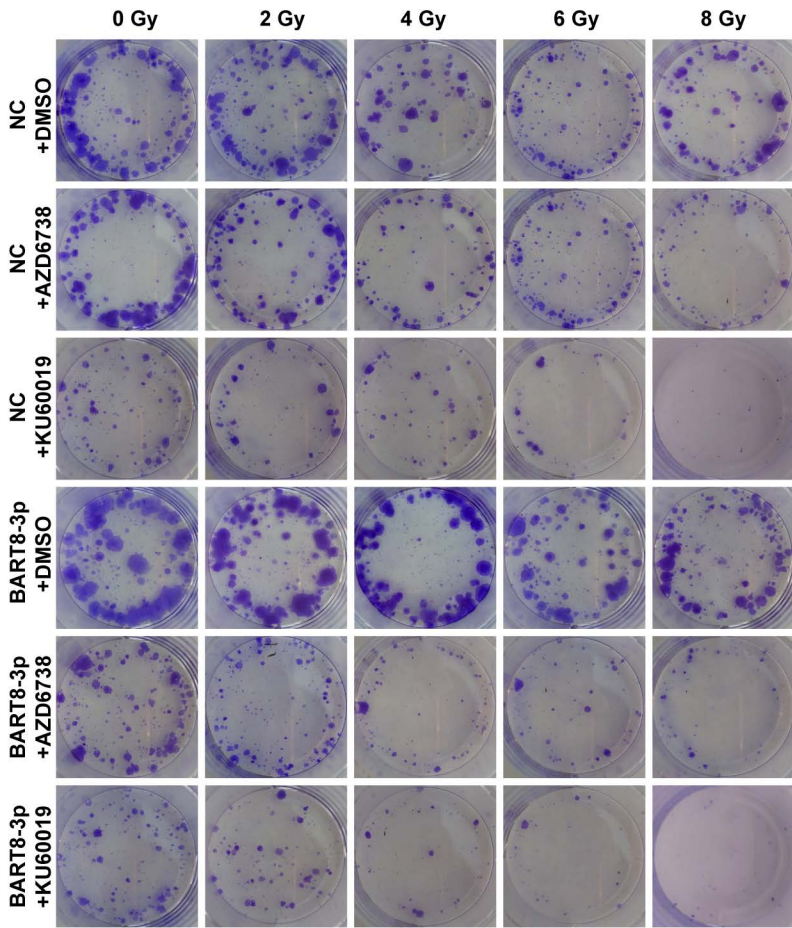

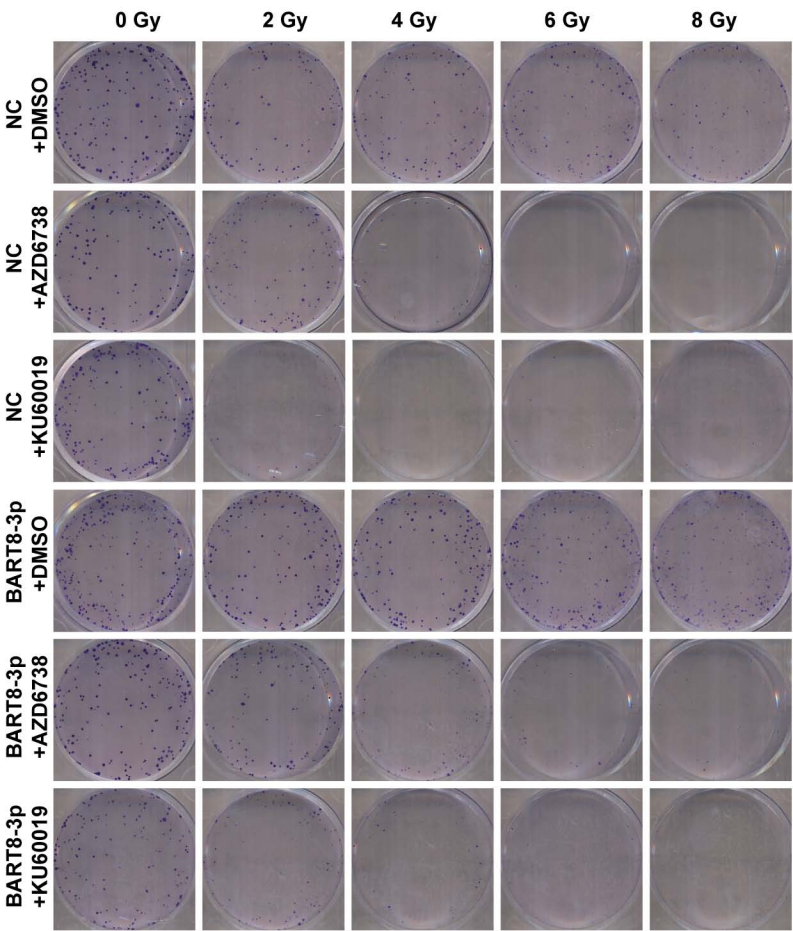

Supplementary Fig.5

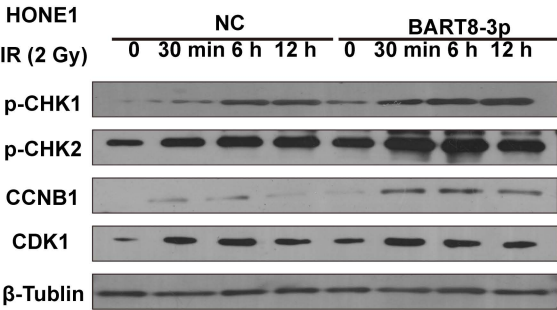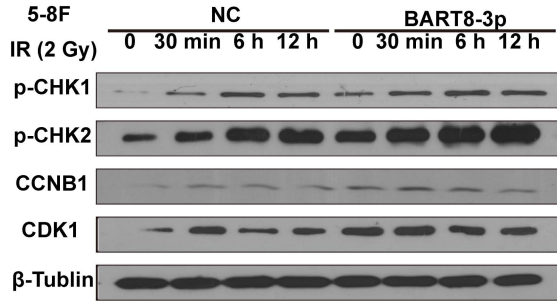

Supplement: bsr20190415_Supp1.pdf [file bsr20190415_Supp1.pdf]
